# Supplementary material for: Genetic Markers Can Predict Chondrogenic Differentiation Potential in Bone Marrow-Derived Mesenchymal Stromal Cells
Source: Hindawi journal article supplement (doi:10.1155/2018/9530932), 2018-10-10
Supplement: f1 [file 9530932.f1.pdf]

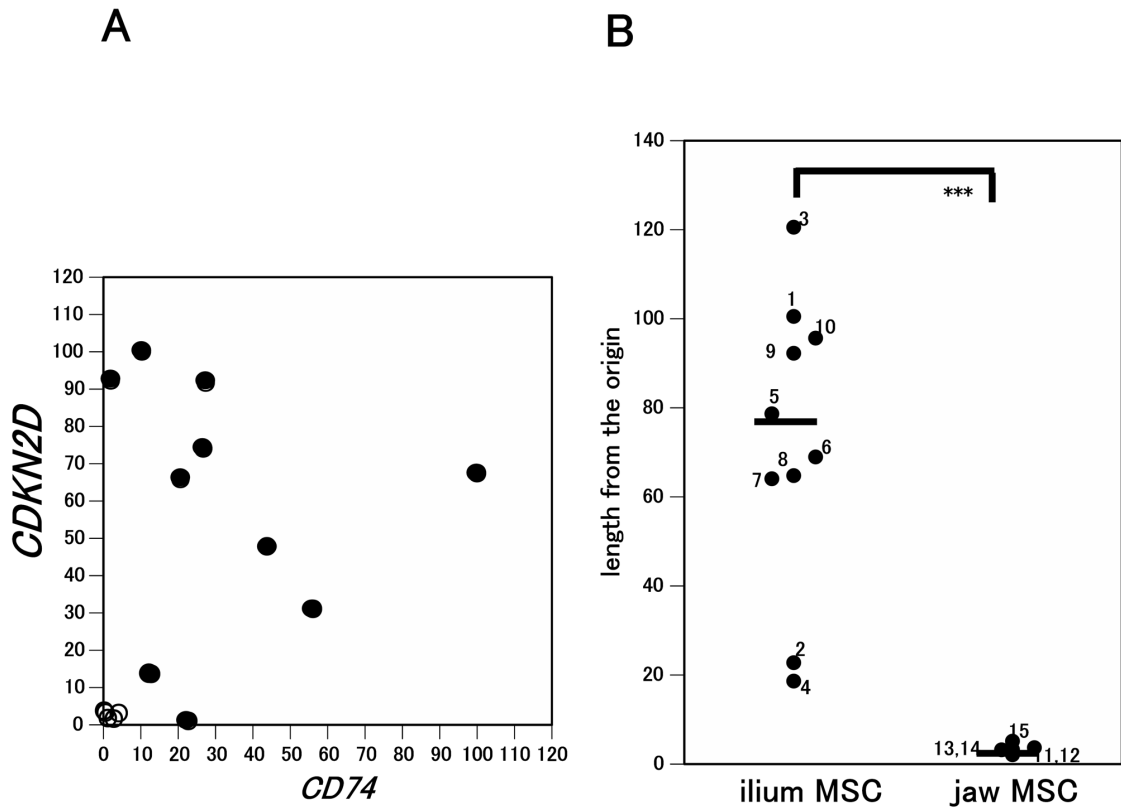

Figure S1: Combined two-dimensional analysis of CD74 and CDKN2D mRNA expression levels are presented in a scatter plot (A). The relative mRNA expression levels in ilium MSCs (closed circles) and jaw MSCs (open circles) are presented relative to maximum values of 100. (B) Distances between data points and the origin are shown in panel A; ilium MSCs (Nos. 1–10) and jaw MSCs (Nos. 11–15). The mean values for each group are indicated as bars. The numbers in the graphs correspond to the donor IDs in Supplementary Table I; \*\*\* $P < 0.001$ ; Student's  $t$ -test.

Table S1: Correlation coefficients for gene expression levels in undifferentiated MSC and GAG contents after chondrogenic induction

| donor ID number   | 1      | 2      | 3       | 4      | 5       | 6       | 7       | 8       | 9      | 10      | 11     | 12     | 13     | 14     | 15     |          |
|-------------------|--------|--------|---------|--------|---------|---------|---------|---------|--------|---------|--------|--------|--------|--------|--------|----------|
| donor age (years) | 63     | 39     | 25      | 64     | 59      | 55      | 61      | 53      | 81     | 65      | 63     | 36     | 36     | 20     | 28     | r        |
| GAG (µg/µgDNA)    | 8.41   | 2.34   | 29.40   | 21.27  | 24.66   | 7.22    | 2.64    | 4.56    | 11.07  | 15.91   | 0.17   | 0.13   | 0.29   | 0.18   | 0.26   |          |
| ACLY              | 7.90   | 3.13   | 7.91    | 1.33   | 7.86    | 5.03    | 6.97    | 7.28    | 8.21   | 7.17    | 1.00   | 1.82   | 2.15   | 1.03   | 1.57   | 0.531 *  |
| ACVR2B            | 7.77   | 3.86   | 5.30    | 1.00   | 5.47    | 3.53    | 3.35    | 2.96    | 5.07   | 4.86    | 16.99  | 28.18  | 18.83  | 11.96  | 12.18  | -0.520 * |
| ADD3              | 2.96   | 2.84   | 2.58    | 1.00   | 2.45    | 1.87    | 3.09    | 2.77    | 2.35   | 3.84    | 7.75   | 10.99  | 5.50   | 12.78  | 8.01   | -0.588 * |
| AMD1              | 5.35   | 2.05   | 3.95    | 1.00   | 3.93    | 3.25    | 4.66    | 4.34    | 6.22   | 6.80    | 2.73   | 3.23   | 4.31   | 2.50   | 4.28   | 0.087    |
| AMFR              | 4.90   | 2.06   | 3.71    | 1.00   | 3.69    | 1.76    | 2.66    | 4.88    | 3.29   | 4.04    | 5.52   | 8.09   | 6.70   | 7.28   | 4.95   | -0.484   |
| API52             | 7.97   | 1.53   | 4.22    | 1.00   | 2.65    | 2.45    | 4.93    | 2.62    | 5.35   | 6.41    | 6.19   | 7.95   | 6.30   | 12.27  | 5.65   | -0.421   |
| ARHGD1B           | 5.67   | 43.96  | 64.74   | 1.00   | 11.36   | 4.80    | 9.47    | 10.09   | 32.74  | 27.74   | 13.84  | 7.53   | 1.00   | 2.61   | 1.00   | 0.482    |
| AURKB             | 6.89   | 1.65   | 11.97   | 1.86   | 8.65    | 8.72    | 2.78    | 2.38    | 17.63  | 11.87   | 2.03   | 2.95   | 4.60   | 1.48   | 1.00   | 0.570 *  |
| ZFAND6            | 4.01   | 2.30   | 2.72    | 1.00   | 3.24    | 2.03    | 2.08    | 3.76    | 2.81   | 3.76    | 5.03   | 6.58   | 6.85   | 5.24   | 8.91   | -0.545 * |
| BM11              | 4.31   | 1.35   | 2.02    | 1.00   | 3.19    | 2.10    | 2.63    | 3.77    | 3.60   | 4.44    | 2.68   | 3.51   | 5.14   | 3.37   | 4.00   | -0.316   |
| BMP4              | 20.77  | 1.00   | 1.41    | 1.50   | 6.89    | 5.38    | 4.44    | 7.84    | 7.69   | 11.09   | 20.05  | 38.64  | 11.01  | 54.30  | 10.11  | -0.457   |
| CCNB1             | 4.68   | 1.00   | 6.51    | 1.03   | 4.05    | 5.07    | 2.18    | 2.10    | 8.81   | 9.14    | 2.47   | 3.56   | 3.50   | 1.35   | 2.30   | 0.441    |
| CCND1             | 11.16  | 3.35   | 1.77    | 1.33   | 1.65    | 1.00    | 4.68    | 4.10    | 5.83   | 3.24    | 9.77   | 11.15  | 25.58  | 10.42  | 9.60   | -0.573 * |
| CD74              | 49.05  | 108.12 | 475.17  | 60.81  | 127.06  | 98.06   | 266.55  | 208.06  | 9.45   | 130.24  | 5.76   | 13.36  | 2.77   | 1.00   | 19.62  | 0.565 *  |
| CD97              | 6.79   | 2.28   | 3.64    | 1.00   | 2.47    | 1.94    | 2.82    | 2.51    | 5.89   | 4.10    | 1.55   | 5.57   | 7.79   | 4.26   | 1.14   | -0.142   |
| CDC20             | 7.80   | 4.37   | 11.94   | 1.00   | 7.19    | 9.13    | 3.35    | 2.71    | 15.51  | 12.58   | 4.37   | 5.16   | 5.62   | 1.19   | 2.30   | 0.466    |
| CDKN2D            | 107.42 | 1.00   | 72.35   | 14.56  | 79.48   | 70.70   | 33.28   | 51.29   | 99.08  | 98.45   | 1.83   | 1.66   | 3.45   | 3.96   | 3.30   | 0.577 *  |
| CDKN3             | 8.28   | 3.07   | 6.28    | 1.00   | 3.76    | 4.85    | 2.07    | 1.44    | 9.89   | 8.13    | 15.78  | 18.46  | 21.38  | 6.72   | 12.06  | -0.437   |
| COL7A1            | 11.63  | 2.58   | 4.81    | 1.72   | 3.79    | 3.60    | 3.03    | 7.97    | 8.47   | 10.19   | 1.53   | 4.08   | 3.69   | 1.00   | 2.76   | 0.216    |
| CTGF              | 2.55   | 7.50   | 2.29    | 2.29   | 3.30    | 3.97    | 4.23    | 4.70    | 4.17   | 3.91    | 1.50   | 1.84   | 1.00   | 4.31   | 2.55   | -0.094   |
| DNC11             | 12.67  | 10.94  | 17.47   | 3.39   | 15.32   | 7.22    | 19.86   | 15.11   | 23.86  | 20.00   | 3.53   | 2.65   | 1.00   | 3.44   | 5.53   | 0.451    |
| DPYSL3            | 3.31   | 2.61   | 4.28    | 1.00   | 4.89    | 2.44    | 4.43    | 5.37    | 3.98   | 5.48    | 3.27   | 2.88   | 2.34   | 1.29   | 4.18   | 0.245    |
| E2F1              | 5.83   | 1.74   | 7.37    | 1.00   | 4.16    | 4.82    | 2.75    | 2.56    | 7.44   | 6.49    | 1.52   | 1.76   | 2.64   | 1.94   | 1.41   | 0.566 *  |
| EDG2              | 20.15  | 1.93   | 3.70    | 1.00   | 3.47    | 3.22    | 4.26    | 4.06    | 4.56   | 7.63    | 15.68  | 17.90  | 17.68  | 12.51  | 8.21   | -0.497   |
| EDG7              | 371.40 | 1.00   | 1.00    | 3.44   | 4.57    | 1.00    | 3.32    | 4.51    | 1.00   | 13.67   | 80.83  | 87.69  | 33.90  | 1.00   | 6.04   | -0.123   |
| EFEMP1            | 3.15   | 5.06   | 24.85   | 5.28   | 8.41    | 10.34   | 3.99    | 12.75   | 6.85   | 2.85    | 1.25   | 3.69   | 1.00   | 2.95   | 3.62   | 0.637 *  |
| EIF4G2            | 4.47   | 3.51   | 3.33    | 1.00   | 3.13    | 2.56    | 2.64    | 3.88    | 3.82   | 4.45    | 6.75   | 7.95   | 9.10   | 6.89   | 9.01   | -0.623 * |
| F2R               | 40.85  | 13.19  | 1.00    | 1.58   | 2.03    | 5.28    | 3.42    | 3.98    | 2.05   | 3.30    | 88.86  | 192.07 | 204.62 | 462.44 | 196.32 | -0.530 * |
| MCTP2             | 33.06  | 1.00   | 1.78    | 1.71   | 21.05   | 9.17    | 10.07   | 12.25   | 12.51  | 8.15    | 40.17  | 119.57 | 63.25  | 10.97  | 38.79  | -0.445   |
| FST               | 10.93  | 1.29   | 1.69    | 1.00   | 1.77    | 1.65    | 2.49    | 4.09    | 3.26   | 5.36    | 10.10  | 19.58  | 22.05  | 37.80  | 11.17  | -0.531 * |
| GABRB1            | 1.00   | 1.00   | 1.00    | 1.00   | 1.00    | 1.00    | 1.00    | 1.00    | 1.00   | 1.00    | 3.26   | 6.33   | 1.00   | 1.01   | 2.57   | -0.380   |
| GMFG              | 51.36  | 12.53  | 282.29  | 1.00   | 13.14   | 23.92   | 23.65   | 7.36    | 10.11  | 17.15   | 11.10  | 53.57  | 23.82  | 32.27  | 50.34  | 0.479    |
| GRP37             | 22.59  | 1.00   | 25.67   | 11.43  | 25.68   | 21.54   | 22.46   | 33.71   | 55.00  | 51.26   | 22.22  | 3.02   | 4.02   | 1.00   | 1.00   | 0.436    |
| HGF               | 5.25   | 2.65   | 4.05    | 1.00   | 6.46    | 3.01    | 7.68    | 3.22    | 4.60   | 7.11    | 3.88   | 6.21   | 2.36   | 6.12   | 2.79   | 0.023    |
| HLA-DRA           | 420.47 | 813.77 | 7043.76 | 891.34 | 3723.59 | 1555.50 | 8657.26 | 4388.44 | 41.46  | 1301.63 | 37.92  | 96.69  | 1.00   | 12.90  | 192.60 | 0.391    |
| HLA-DR3           | 1.00   | 33.48  | 1.83    | 56.93  | 180.53  | 9.18    | 763.47  | 45.31   | 1.42   | 32.79   | 1.00   | 1.00   | 1.00   | 1.00   | 1.00   | -0.039   |
| HNRPU             | 5.27   | 2.32   | 4.50    | 1.00   | 3.27    | 3.02    | 2.88    | 3.93    | 4.31   | 4.87    | 5.29   | 4.86   | 5.05   | 6.04   | 5.12   | -0.357   |
| ICAM1             | 14.19  | 43.36  | 36.65   | 3.89   | 97.90   | 14.87   | 35.24   | 62.73   | 12.91  | 35.19   | 5.44   | 26.02  | 1.00   | 38.10  | 14.83  | 0.343    |
| IFI44             | 3.67   | 1.69   | 4.73    | 1.00   | 4.39    | 3.77    | 2.96    | 2.18    | 3.81   | 9.32    | 4.49   | 4.91   | 4.07   | 4.38   | 2.73   | 0.172    |
| IGF1              | 1.00   | 1.32   | 1.57    | 2.37   | 8.79    | 4.09    | 4.96    | 8.18    | 2.35   | 6.59    | 5.59   | 6.41   | 1.28   | 8.49   | 6.32   | -0.136   |
| IGFBP5            | 6.44   | 3.78   | 6.67    | 1.03   | 1.62    | 1.00    | 4.75    | 2.44    | 4.15   | 6.28    | 43.24  | 47.49  | 16.77  | 50.54  | 89.51  | -0.523 * |
| IGFBP7            | 1.68   | 1.46   | 2.79    | 0.85   | 3.43    | 3.38    | 1.00    | 1.97    | 1.85   | 4.32    | 1.83   | 2.47   | 1.58   | 6.09   | 2.27   | 0.072    |
| IL13RA2           | 55.24  | 1.00   | 13.19   | 2.43   | 3.25    | 7.20    | 78.01   | 28.86   | 61.36  | 46.75   | 11.95  | 13.00  | 9.08   | 2.52   | 13.50  | -0.049   |
| INPP5E            | 8.15   | 1.94   | 7.55    | 1.84   | 5.27    | 3.58    | 3.96    | 6.94    | 7.28   | 8.61    | 1.65   | 4.48   | 4.57   | 3.70   | 1.00   | 0.428    |
| ITGA3             | 19.98  | 8.16   | 13.13   | 1.00   | 5.96    | 4.35    | 14.70   | 7.32    | 12.35  | 19.41   | 4.82   | 6.29   | 8.10   | 6.44   | 18.15  | 0.017    |
| ITGA5             | 3.70   | 5.12   | 5.39    | 1.35   | 6.20    | 3.98    | 5.70    | 7.94    | 5.85   | 6.80    | 1.00   | 1.64   | 1.46   | 1.00   | 1.89   | 0.402    |
| ITGA6             | 71.48  | 5.15   | 4.44    | 1.00   | 10.67   | 10.58   | 36.96   | 51.64   | 121.51 | 103.91  | 106.94 | 94.41  | 77.33  | 18.30  | 114.62 | -0.412   |
| KCNK12            | 1.00   | 1.00   | 1.00    | 1.00   | 1.00    | 1.00    | 1.00    | 1.00    | 1.00   | 1.00    | 2.21   | 13.13  | 1.00   | 1.00   | 4.80   | -0.327   |
| KCNV2             | 6.80   | 1.00   | 1.00    | 1.00   | 1.00    | 1.00    | 1.00    | 1.00    | 1.19   | 1.21    | 16.88  | 6.09   | 6.14   | 1.00   | 1.00   | -0.361   |
| KCTD12            | 6.01   | 3.03   | 3.44    | 1.00   | 4.49    | 1.61    | 4.24    | 2.77    | 3.17   | 6.17    | 3.87   | 2.91   | 4.76   | 1.81   | 2.78   | 0.082    |
| LAMA3             | 9.00   | 1.00   | 1.26    | 3.12   | 4.34    | 2.21    | 4.40    | 7.85    | 3.66   | 7.45    | 3.92   | 2.75   | 7.80   | 2.36   | 4.91   | -0.143   |
| LEPR              | 18.90  | 1.21   | 21.25   | 1.00   | 1.96    | 3.17    | 2.46    | 2.00    | 1.38   | 2.07    | 36.03  | 44.00  | 21.74  | 122.06 | 23.23  | -0.369   |
| LIF               | 61.87  | 19.90  | 60.39   | 10.39  | 65.84   | 43.08   | 38.59   | 32.33   | 66.66  | 74.06   | 8.82   | 5.70   | 21.43  | 27.65  | 1.00   | 0.603 *  |
| LRP8              | 11.43  | 2.65   | 2.64    | 1.32   | 6.00    | 2.68    | 5.83    | 6.80    | 10.83  | 8.00    | 1.07   | 2.70   | 1.89   | 1.00   | 2.00   | 0.204    |
| MCAM              | 30.70  | 41.87  | 197.66  | 24.55  | 63.88   | 56.08   | 222.30  | 151.21  | 183.32 | 212.27  | 1.64   | 7.90   | 1.00   | 2.68   | 30.82  | 0.414    |
| MCM5              | 5.43   | 3.83   | 6.46    | 1.00   | 3.96    | 4.92    | 2.45    | 2.17    | 8.18   | 7.48    | 3.68   | 5.08   | 5.90   | 4.49   | 3.47   | 0.158    |
| MCM7              | 7.26   | 4.18   | 6.76    | 1.00   | 4.07    | 5.64    | 2.89    | 2.99    | 8.01   | 7.55    | 2.07   | 3.34   | 3.50   | 2.22   | 2.75   | 0.375    |
| TAF1D             | 5.71   | 1.25   | 2.68    | 1.00   | 2.96    | 2.69    | 3.13    | 3.47    | 3.99   | 4.11    | 1.71   | 2.97   | 2.22   | 2.12   | 2.34   | 0.100    |
| MGP               | 144.38 | 117.61 | 152.97  | 82.08  | 933.56  | 49.38   | 196.27  | 631.65  | 35.40  | 202.33  | 289.56 | 331.07 | 1.00   | 109.25 | 235.89 | 0.241    |
| MICA              | 2.71   | 1.20   | 2.61    | 1.00   | 2.82    | 1.70    | 1.73    | 3.82    | 6.11   | 2.67    | 1.91   | 1.31   | 1.46   | 4.28   | 3.31   | 0.047    |
| NDUFA8            | 4.19   | 2.92   | 4.38    | 1.00   | 3.62    | 2.04    | 3.79    | 3.52    | 5.21   | 5.22    | 8.89   | 11.86  | 11.62  | 12.14  | 13.29  | -0.577 * |
| NFE2L3            | 8.92   | 9.18   | 20.47   | 1.00   | 6.59    | 5.51    | 6.81    | 3.37    | 9.88   | 6.13    | 6.89   | 16.89  | 11.04  | 6.15   | 1.95   | 0.191    |
| NPR3              | 14.70  | 7.58   | 50.15   | 7.67   | 6.65    | 16.67   | 10.03   | 7.78    | 10.74  | 8.41    | 3.26   | 4.09   | 2.16   | 31.52  | 1.00   | 0.464    |
| NTSE              | 15.55  | 3.26   | 4.26    | 1.00   | 3.19    | 2.48    | 4.50    | 3.16    | 9.67   | 9.34    | 11.32  | 16.82  | 16.41  | 9.95   | 10.01  | -0.486   |
| P4HA2             | 2.36   | 3.46   | 2.59    | 3.74   | 13.95   | 4.93    | 13.14   | 16.28   | 15.83  | 13.93   | 1.14   | 1.04   | 1.59   | 1.00   | 5.69   | 0.253    |
| PGR               | 73.41  | 1.00   | 2.24    | 1.39   | 4.12    | 1.00    | 4.31    | 1.31    | 4.51   | 1.73    | 8.93   | 9.70   | 7.58   | 1.00   | 1.45   | -0.054   |
| PGRMC2            | 6.58   | 3.88   | 3.63    | 1.00   | 3.51    | 2.87    | 3.60    | 5.31    | 3.31   | 3.35    | 8.24   | 13.82  | 9.27   | 16.27  | 12.28  | -0.629 * |
| PLAU              | 4.40   | 11.43  | 4.77    | 1.00   | 6.96    | 3.47    | 2.42    | 4.50    | 1.70   | 1.68    | 12.09  | 13.10  | 9.42   | 4.59   | 10.96  | -0.501   |
| PLEC1             | 5.53   | 4.01   | 3.64    | 1.00   | 1.83    | 1.82    | 2.96    | 3.83    | 4.19   | 4.81    | 2.63   | 3.35   | 4.19   | 2.83   | 4.31   | -0.249   |
| PQBPI             | 5.95   | 3.18   | 4.98    | 1.00   | 3.71    | 3.47    | 3.22    | 4.29    | 5.01   | 6.85    | 9.32   | 13.82  | 11.20  | 14.40  | 13.32  | -0.566 * |
| PRG1              | 2.39   | 5.57   | 5.93    | 1.00   | 3.50    | 2.37    | 5.39    | 5.11    | 4.19   | 3.87    | 1.06   | 1.47   | 2.14   | 2.93   | 12.91  | -0.073   |
| PRKAG1            | 5.85   | 1.44   | 5.59    | 1.00   | 4.46    | 2.75    | 3.96    | 4.56    | 5.38   | 6.84    | 3.32   | 4.97   | 4.17   | 3.21   | 4.01   | 0.204    |
| PROS1             | 6.17   | 1.00   | 4.17    | 2.43   | 9.80    | 5.39    | 3.66    | 9.79    | 3.75   | 6.81    | 3.20   | 5.36   | 1.26   | 9.93   | 6.53   | 0.097    |
| PSMC5             | 5.76   | 1.00   | 6.34    | 1.19   | 5       |         |         |         |        |         |        |        |        |        |        |          |
